# Supplementary material for: Be3B11−cluster: a dynamically fluxional beryllo-borospherene
Source: Royal Society of Chemistry journal article supplement (doi:10.1039/d2cp04948a), 2022-12-20
Supplement: d2cp04948a1.pdf [file d2cp04948a1.pdf]

## SUPPORTING INFORMATION

### **Be<sub>3</sub>B<sub>11</sub><sup>-</sup> cluster: A dynamically fluxional beryllio-borospherene†**

Ying-Jin Wang,<sup>\*a</sup> Lin-Yan Feng,<sup>a</sup> Miao Yan,<sup>a</sup> and Hua-Jin Zhai<sup>\*b</sup>

<sup>a</sup>*Department of Chemistry, Xinzhou Teachers University, Xinzhou 034000, China*

<sup>b</sup>*Nanocluster Laboratory, Institute of Molecular Science, Shanxi University, Taiyuan 030006, China*

\*E-mail: yingjinwang@sxu.edu.cn; hj.zhai@sxu.edu.cn

### **Supplementary Information – Part I**

- Table S1.** Cartesian coordinates for (a) the global-minimum (GM) ( $C_{2v}$ ,  $^1A_1$ ), (b) the local minimum (LM) ( $C_s$ ,  $^1A'$ ), and (c) the transition state (TS) ( $C_1$ ,  $^1A$ ) structures of Be<sub>3</sub>B<sub>11</sub><sup>-</sup> cluster at the PBE0/6-311+G\* level.
- Figure S1.** Alternative optimized structures of Be<sub>3</sub>B<sub>11</sub><sup>-</sup> cluster at the PBE0/6-311+G\* level, the relative energies (in eV) are shown in square bracket with the corrections of zero-point energies (ZPEs), as well as for top four isomers at the single-point CCSD(T)/6-311+G\*//PBE0/6-311+G\* level.
- Figure S2.** The bond distances (in Å) obtained at the PBE0/6-311+G(d) level for (a) the GM ( $C_{2v}$ ,  $^1A_1$ ) and (b) the LM ( $C_s$ ,  $^1A'$ ) structures of Be<sub>3</sub>B<sub>11</sub><sup>-</sup> cluster.

- Figure S3.** Calculated Wiberg bond indices (WBIs) in black and natural atomic charges (in  $|e|$ ) in blue for (a) the GM ( $C_{2v}$ ,  $^1A_1$ ) and (b) the LM ( $C_s$ ,  $^1A'$ ) of  $\text{Be}_3\text{B}_{11}^-$  cluster from natural bond orbital (NBO) analyses at the PBE0/6-311+G\* level.
- Figure S4.** The parameters of (a) bond distances, (b) Wiberg bond indices (WBIs) and (c) natural atomic charges in  $|e|$  for TS ( $C_1$ ,  $^1A$ ) structure of  $\text{Be}_3\text{B}_{11}^-$  cluster. The WBIs and natural atomics are obtained from the natural bond orbital (NBO) analysis at the PBE0/6-311+G\* level.
- Figure S5** Born-Oppenheimer molecular dynamic simulations for  $\text{Be}_3\text{B}_{11}^-$  cluster at (a) 300 K, (b) 400 K, and (c) 600 K for 50 ps using the software suite CP2K. Some typical GM structures are picked up during the dynamic simulations. The root-mean-square-deviation (RMSD) and maximum bond length deviation (MAXD) values (on average) are indicated.
- Figure S6.** The canonical molecular orbitals (CMOs) for the GM ( $C_{2v}$ ,  $^1A_1$ ) of  $\text{Be}_3\text{B}_{11}^-$  cluster. (a) Thirteen  $\sigma$  CMOs for ten Lewis two-center two-electron (2c-2e) B–B  $\sigma$  bonds in  $\text{B}_{11}$  skeleton, two three-center two-electron (3c-2e) and one six-center two-electron (6c-2e) delocalized  $\sigma$  bonds on two  $\text{B}_3$  triangles. (b) Four radials  $\pi$  CMOs for three delocalized  $\pi$  bonds on waist and one delocalized  $\pi$  bond on two  $\text{B}_3$  triangles. (c) Three tangential  $\pi$  CMOs for three delocalized  $\pi$  bonds on waist.
- Figure S7.** The CMOs for the LM ( $C_s$ ,  $^1A'$ ) of  $\text{Be}_3\text{B}_{11}^-$  cluster. (a) Thirteen  $\sigma$  CMOs for eleven Lewis 2c-2e B–B  $\sigma$  bonds in  $\text{B}_{11}$  skeleton, one 3c-2e  $\sigma$  bond on bottom  $\text{B}_3$  triangle and one 7c-2e delocalized  $\sigma$  bond on the top  $\text{B}_4$  pyramid and bottom  $\text{B}_3$  triangle. (b) Four radials  $\pi$  CMOs for three delocalized  $\pi$  bonds on waist and one delocalized  $\pi$  bond on top  $\text{B}_4$  pyramid and bottom  $\text{B}_3$  triangle. (c) Three tangential  $\pi$  CMOs for three delocalized  $\pi$  bonds on waist.
- Figure S8.** Electron localization functions (ELFs) for (a) the GM ( $C_{2v}$ ,  $^1A_1$ ), (b) the LM ( $C_s$ ,  $^1A'$ ) and (c) the TS ( $C_1$ ,  $^1A$ ) structures.
- Figure S9.** The CMOs for the TS ( $C_1$ ,  $^1A$ ) of  $\text{Be}_3\text{B}_{11}^-$  cluster. (a) Thirteen  $\sigma$  CMOs for eleven 2c-2e B–B  $\sigma$  bonds in  $\text{B}_{11}$  skeleton, one 3c-2e  $\sigma$  bonds on bottom  $\text{B}_3$  triangle and

one 7c-2e delocalized  $\sigma$  bond on top  $B_4$  pyramid bottom  $B_3$  triangle. (b) Four radials  $\pi$  CMOs for three delocalized  $\pi$  bonds on waist and one delocalized  $\pi$  bond on top  $B_4$  pyramid and bottom  $B_3$  triangle. (c) Three tangential  $\pi$  CMOs for three delocalized  $\pi$  bonds on waist.

**Figure S10.** The adaptive natural density partitioning (AdNDP) bonding pattern for the TS ( $C_1$ ,  $^1A$ ) structure of  $Be_3B_{11}^-$  cluster. The occupation numbers (ONs) are indicated.

**Figure S11.** The evolution process of the delocalized (a) 6c-2e  $\sigma$  bond and (b) 6c-2e  $\pi$  bond on two  $B_3$  triangles during the interconversion between the GM and LM.

## Supplementary Information – Part II

A **short movie** extracted from the BOMD simulation for  $Be_3B_{11}^-$  cluster. The simulation was performed at the temperature of 600 K for 50 ps, starting from the equilibrium GM structure with random atom velocities. The movie roughly covers a time span of 12 ps.

**Figure S1.** Alternative optimized structures of  $\text{Be}_3\text{B}_{11}^-$  cluster at the PBE0/6-311+G\* level, the relative energies (in eV) are shown in square bracket with the corrections of zero-point energies (ZPEs), as well as for top four isomers at the single-point CCSD(T)/6-311+G\*\*/PBE0/6-311+G\* level.

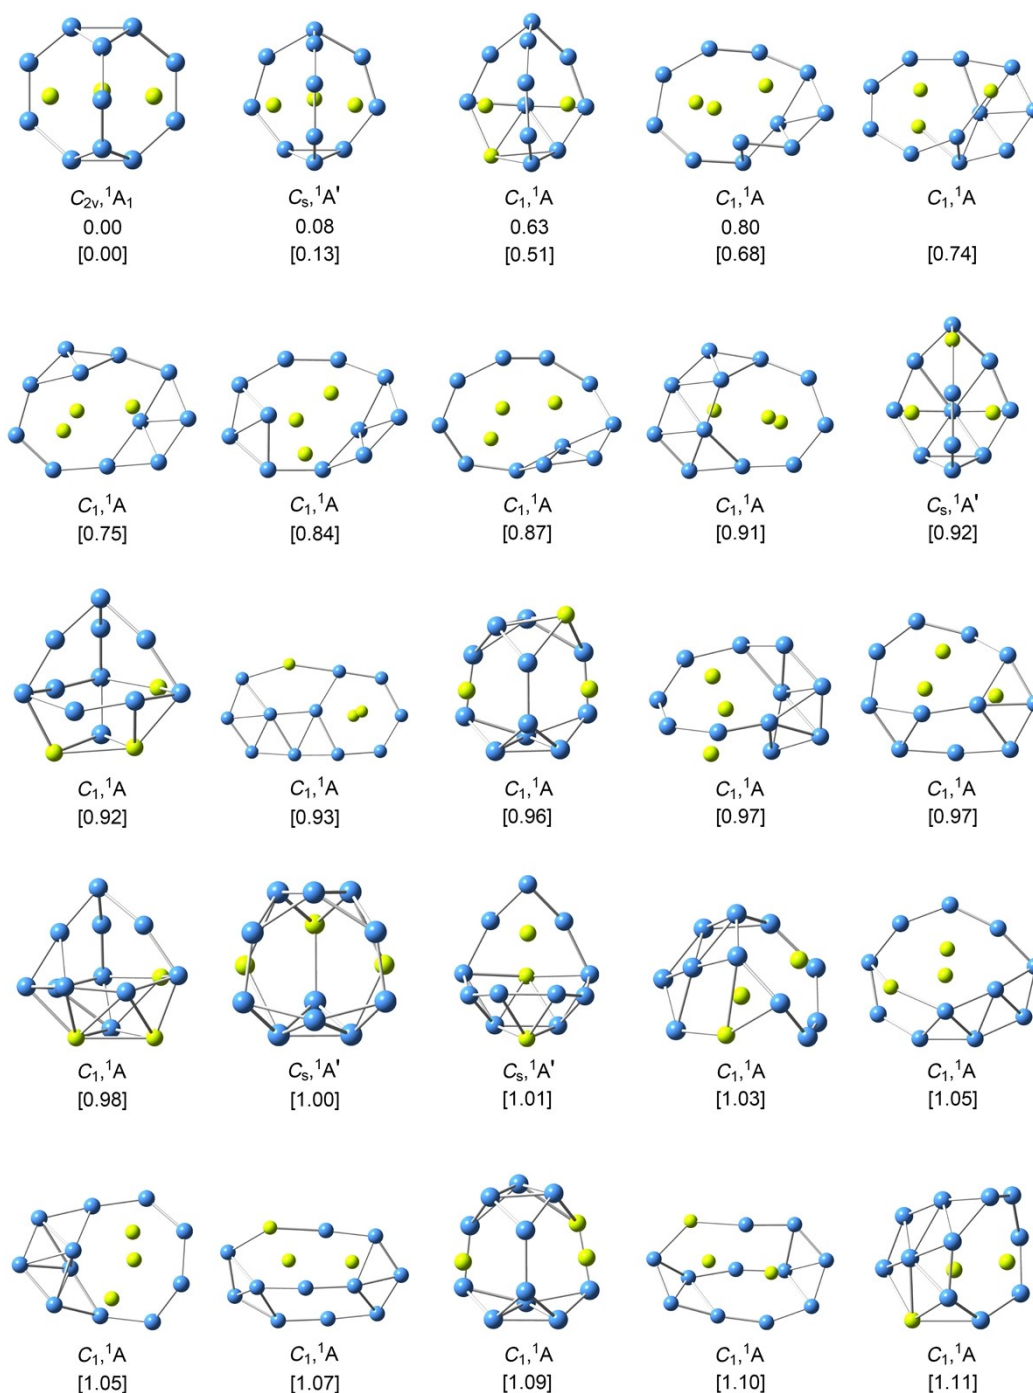

(continued ...)

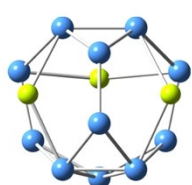

$C_s, ^1A'$   
[1.12]

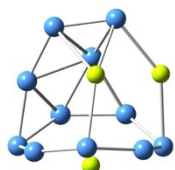

$C_1, ^1A$   
[1.13]

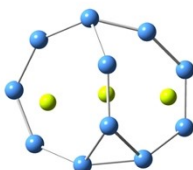

$C_1, ^1A$   
[1.17]

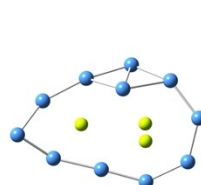

$C_1, ^1A$   
[1.17]

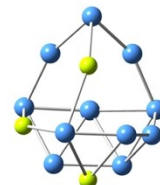

$C_1, ^1A$   
[1.17]

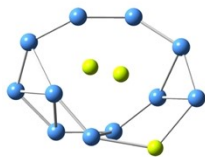

$C_1, ^1A$   
[1.18]

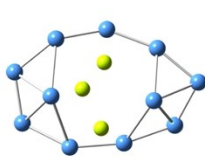

$C_1, ^1A$   
[1.19]

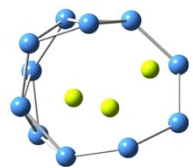

$C_1, ^1A$   
[1.20]

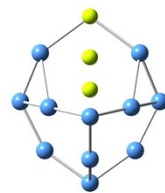

$C_s, ^1A'$   
[1.21]

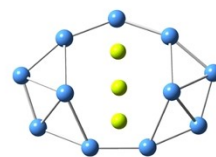

$C_s, ^1A'$   
[1.22]

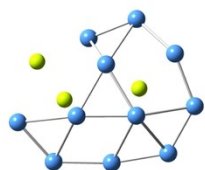

$C_1, ^1A$   
[1.22]

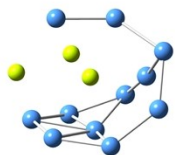

$C_1, ^1A$   
[1.22]

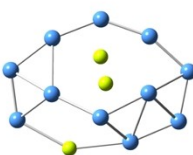

$C_1, ^1A$   
[1.22]

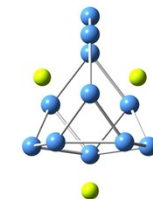

$C_s, ^1A'$   
[1.23]

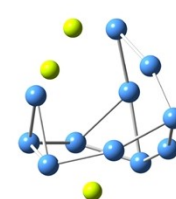

$C_1, ^1A$   
[1.25]

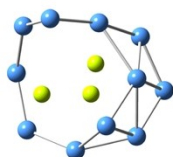

$C_1, ^1A$   
[1.25]

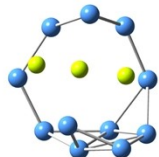

$C_1, ^1A$   
[1.31]

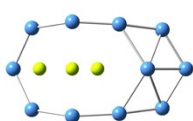

$C_1, ^1A$   
[1.33]

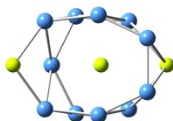

$C_s, ^1A'$   
[1.37]

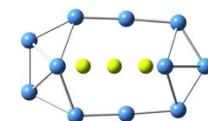

$C_s, ^1A'$   
[1.37]

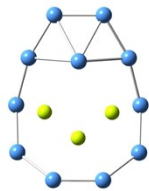

$C_s, ^1A'$   
[1.40]

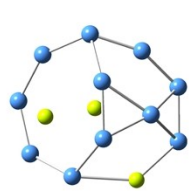

$C_1, ^1A$   
[1.41]

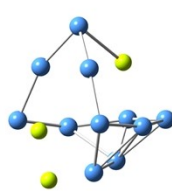

$C_1, ^1A$   
[1.41]

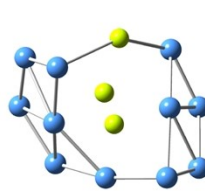

$C_1, ^1A$   
[1.43]

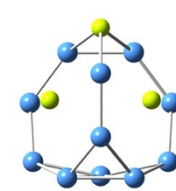

$C_s, ^1A'$   
[1.44]

(continued ...)

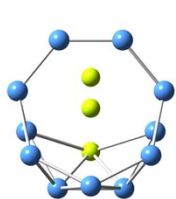

$C_s, 1A'$   
[1.44]

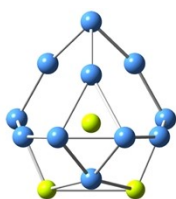

$C_s, 1A'$   
[1.46]

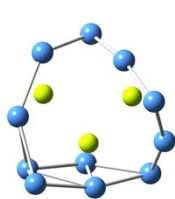

$C_1, 1A$   
[1.48]

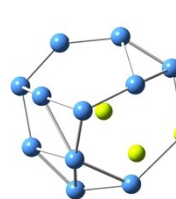

$C_1, 1A$   
[1.49]

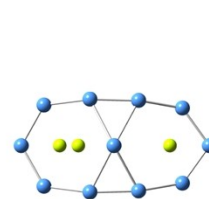

$C_s, 1A'$   
[1.49]

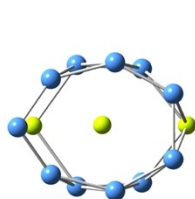

$C_s, 1A'$   
[1.53]

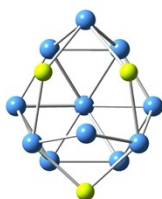

$C_s, 1A'$   
[1.76]

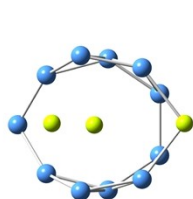

$C_s, 1A'$   
[1.84]

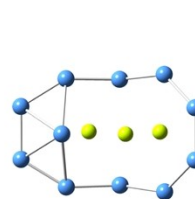

$C_s, 1A'$   
[1.96]

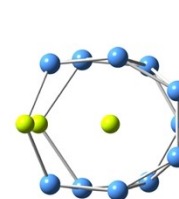

$C_s, 1A'$   
[1.98]

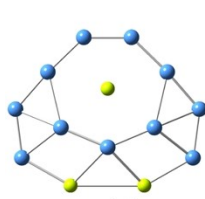

$C_s, 1A'$   
[1.98]

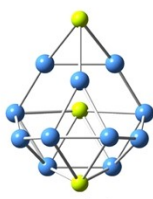

$C_s, 1A'$   
[2.02]

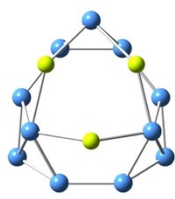

$C_s, 1A'$   
[2.17]

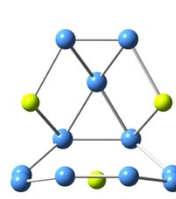

$C_s, 1A'$   
[2.24]

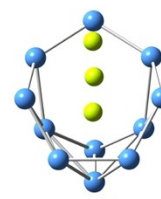

$C_s, 1A'$   
[1.32]

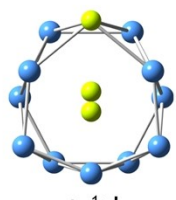

$C_s, 1A'$   
[2.40]

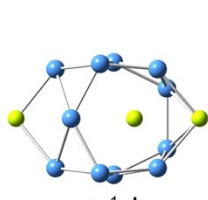

$C_s, 1A'$   
[2.55]

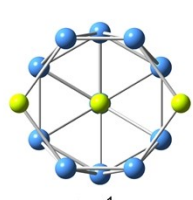

$C_{2v}, 1A_1$   
[2.76]

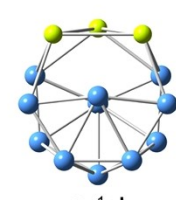

$C_s, 1A'$   
[2.82]

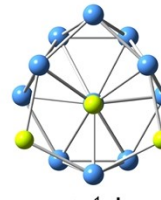

$C_s, 1A'$   
[3.15]

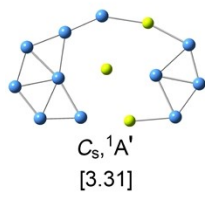

$C_s, 1A'$   
[3.31]

**Figure S2.** The bond distances (in Å) obtained at the PBE0/6-311+G(d) level for (a) the GM ( $C_{2v}$ ,  $^1A_1$ ) and (b) the LM ( $C_s$ ,  $^1A'$ ) structures of  $Be_3B_{11}^-$  cluster.

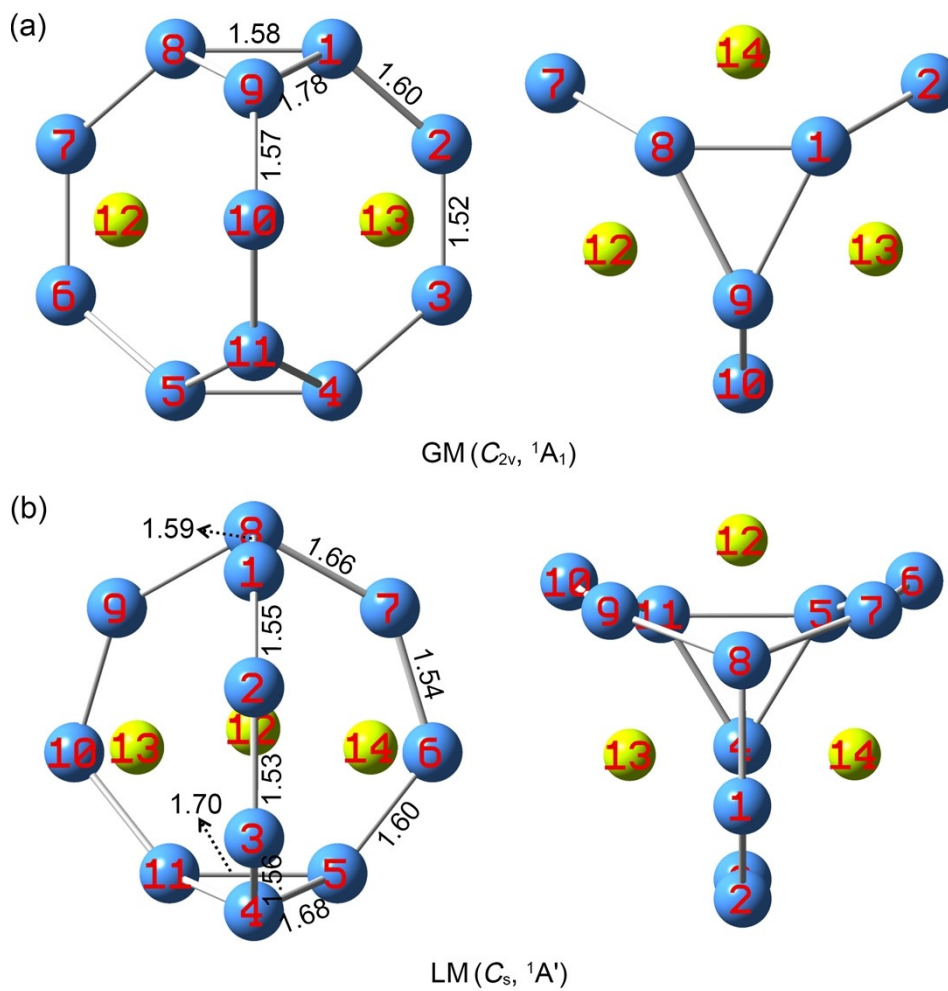





**Figure S4.** The parameters of (a) bond distances, (b) Wiberg bond indices (WBIs) and (c) natural atomic charges in  $|e|$  for TS ( $C_1$ ,  $^1A$ ) structure of  $\text{Be}_3\text{B}_{11}^-$  cluster. The WBIs and natural atoms are obtained from the natural bond orbital (NBO) analysis at the PBE0/6-311+G\* level.

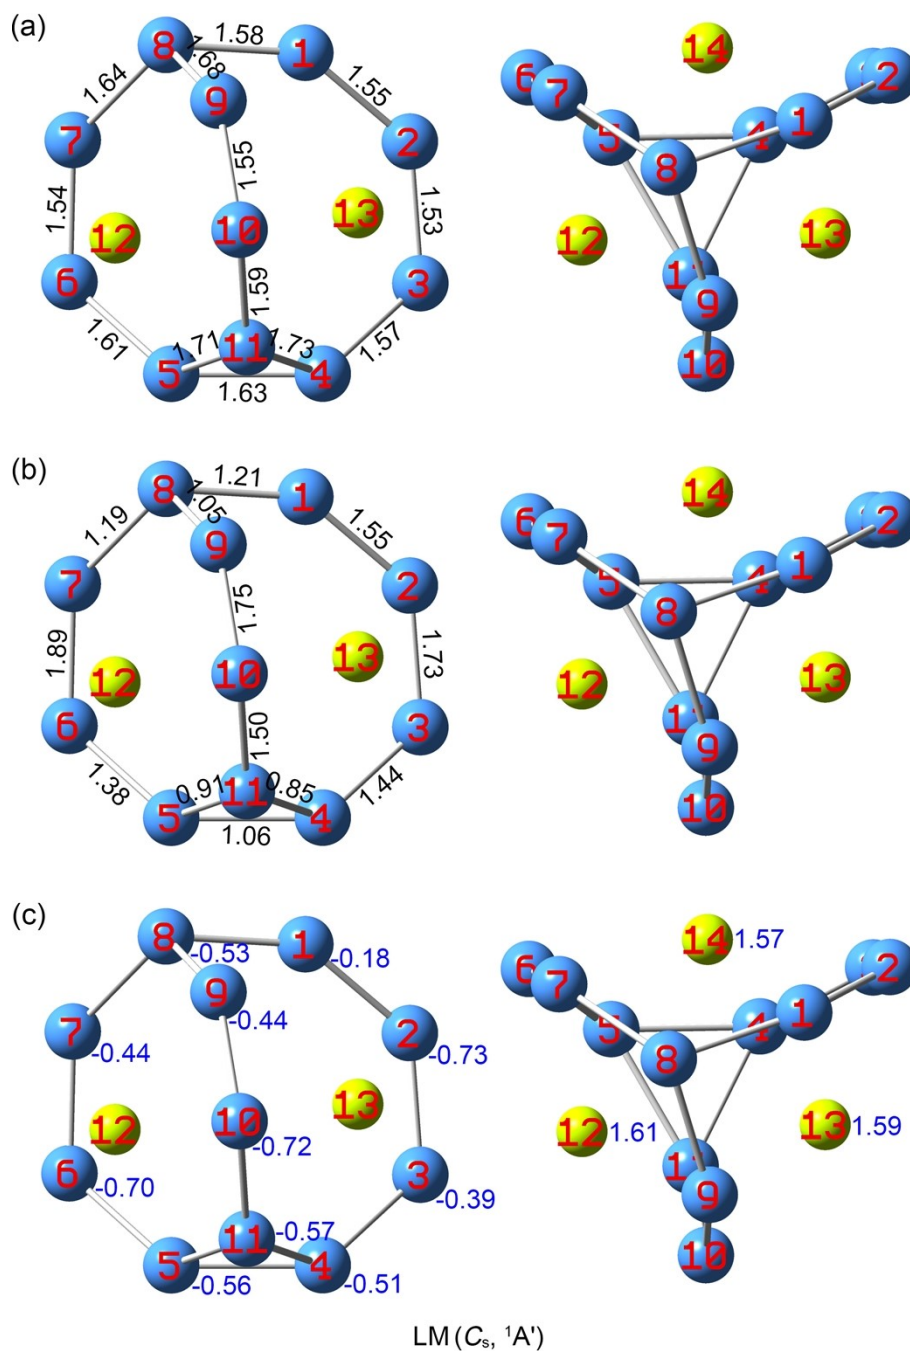

**Figure S5** Born-Oppenheimer molecular dynamic simulations for  $\text{Be}_3\text{B}_{11}^-$  cluster at (a) 300 K, (b) 400 K, and (c) 600 K for 50 ps using the software suite CP2K. Some typical GM structures are picked up during the dynamic simulations. The root-mean-square-deviation (RMSD) and maximum bond length deviation (MAXD) values (on average) are indicated.

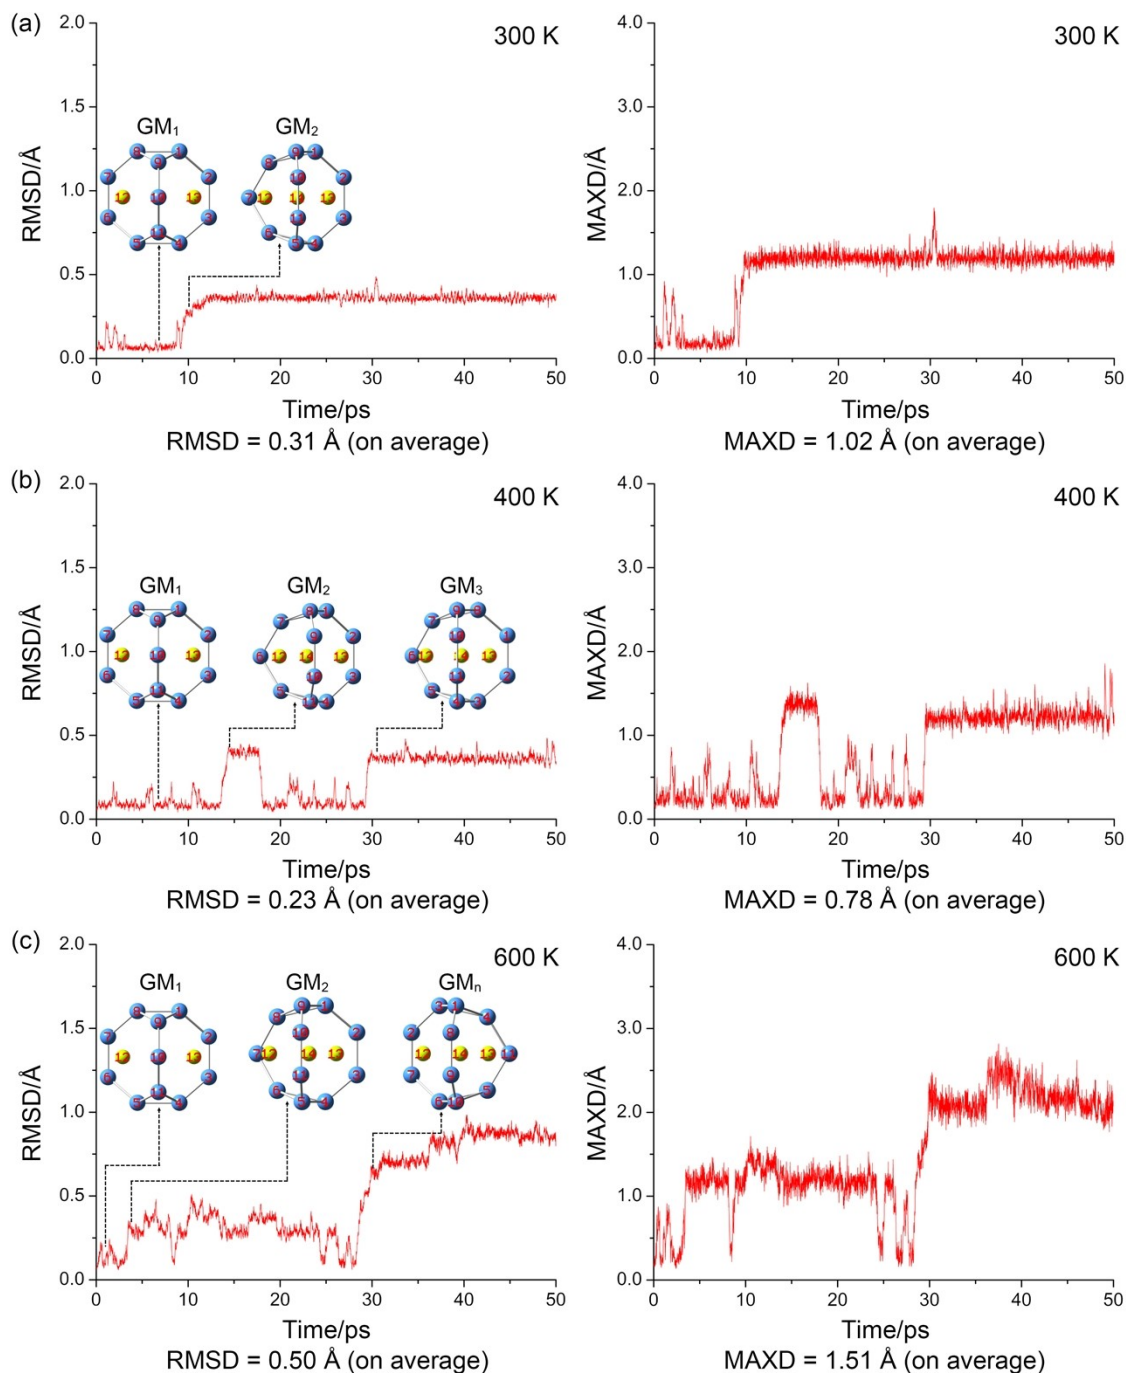

**Figure S6.** The canonical molecular orbitals (CMOs) for the GM ( $C_{2v}$ ,  $^1A_1$ ) of  $\text{Be}_3\text{B}_{11}^-$  cluster. (a) Thirteen  $\sigma$  CMOs for ten Lewis two-center two-electron (2c-2e) B–B  $\sigma$  bonds in  $\text{B}_{11}$  skeleton, two three-center two-electron (3c-2e) and one six-center two-electron (6c-2e) delocalized  $\sigma$  bonds on two  $\text{B}_3$  triangles. (b) Four radials  $\pi$  CMOs for three delocalized  $\pi$  bonds on waist and one delocalized  $\pi$  bond on two  $\text{B}_3$  triangles. (c) Three tangential  $\pi$  CMOs for three delocalized  $\pi$  bonds on waist.

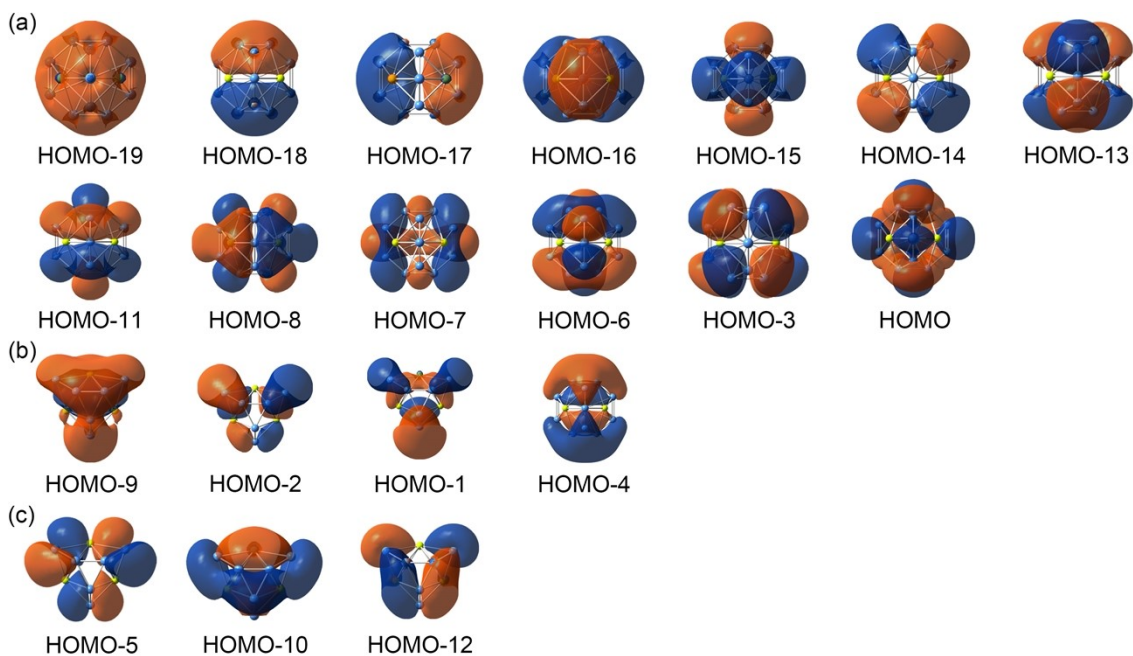

**Figure S7.** The CMOs for the LM ( $C_s$ ,  $^1A'$ ) of  $Be_3B_{11}^-$  cluster. (a) Thirteen  $\sigma$  CMOs for eleven Lewis 2c-2e B–B  $\sigma$  bonds in  $B_{11}$  skeleton, one 3c-2e  $\sigma$  bond on bottom  $B_3$  triangle and one 7c-2e delocalized  $\sigma$  bond on the top  $B_4$  pyramid and bottom  $B_3$  triangle. (b) Four radial  $\pi$  CMOs for three delocalized  $\pi$  bonds on waist and one delocalized  $\pi$  bond on top  $B_4$  pyramid and bottom  $B_3$  triangle. (c) Three tangential  $\pi$  CMOs for three delocalized  $\pi$  bonds on waist.

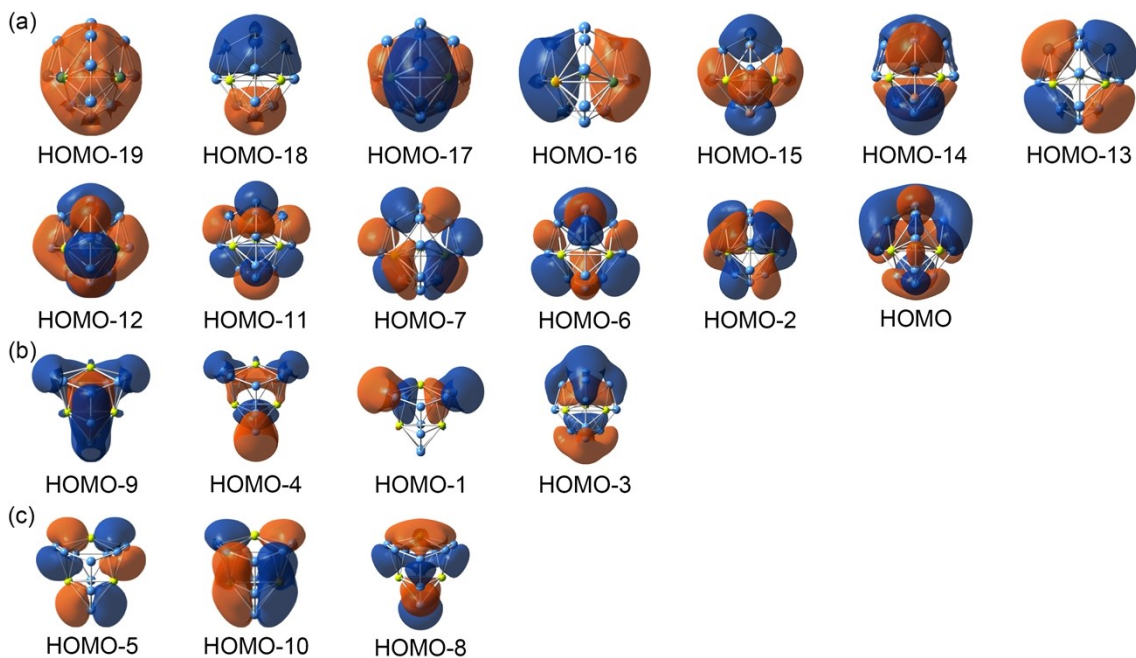

**Figure S8.** Electron localization functions (ELFs) for (a) the GM ( $C_{2v}$ ,  $^1A_1$ ), (b) the LM ( $C_s$ ,  $^1A'$ ) and (c) the TS ( $C_1$ ,  $^1A$ ) structures.

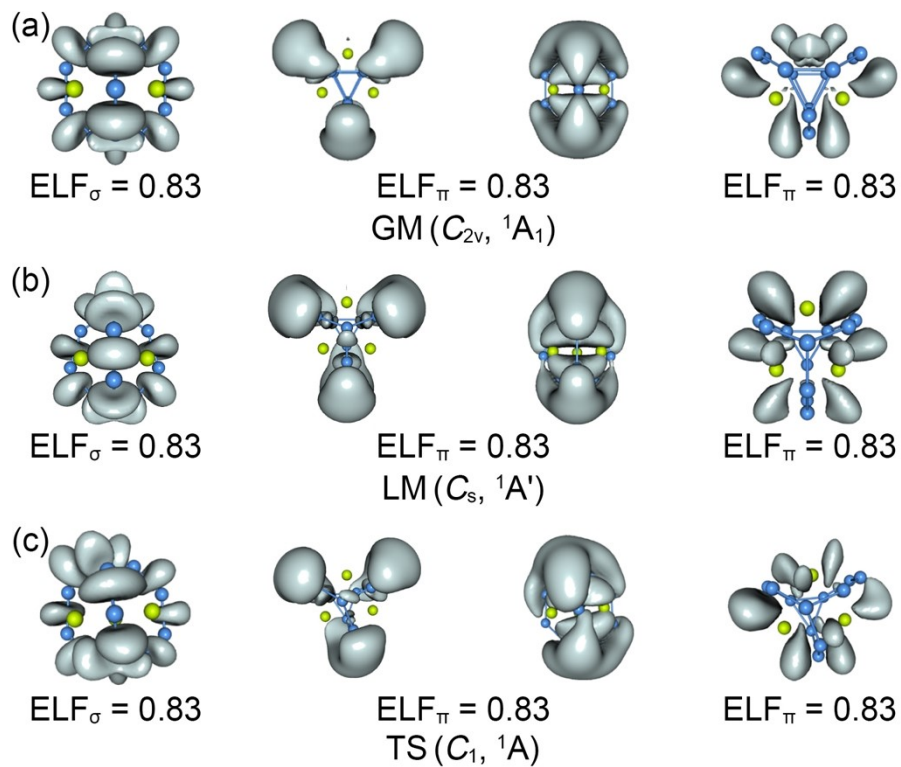

**Figure S9.** The CMOs for the TS ( $C_1$ ,  $^1A$ ) of  $\text{Be}_3\text{B}_{11}^-$  cluster. (a) Thirteen  $\sigma$  CMOs for eleven  $2c-2e$  B–B  $\sigma$  bonds in  $\text{B}_{11}$  skeleton, one  $3c-2e$   $\sigma$  bonds on bottom  $\text{B}_3$  triangle and one  $7c-2e$  delocalized  $\sigma$  bond on top  $\text{B}_4$  pyramid bottom  $\text{B}_3$  triangle. (b) Four radial  $\pi$  CMOs for three delocalized  $\pi$  bonds on waist and one delocalized  $\pi$  bond on top  $\text{B}_4$  pyramid and bottom  $\text{B}_3$  triangle. (c) Three tangential  $\pi$  CMOs for three delocalized  $\pi$  bonds on waist.

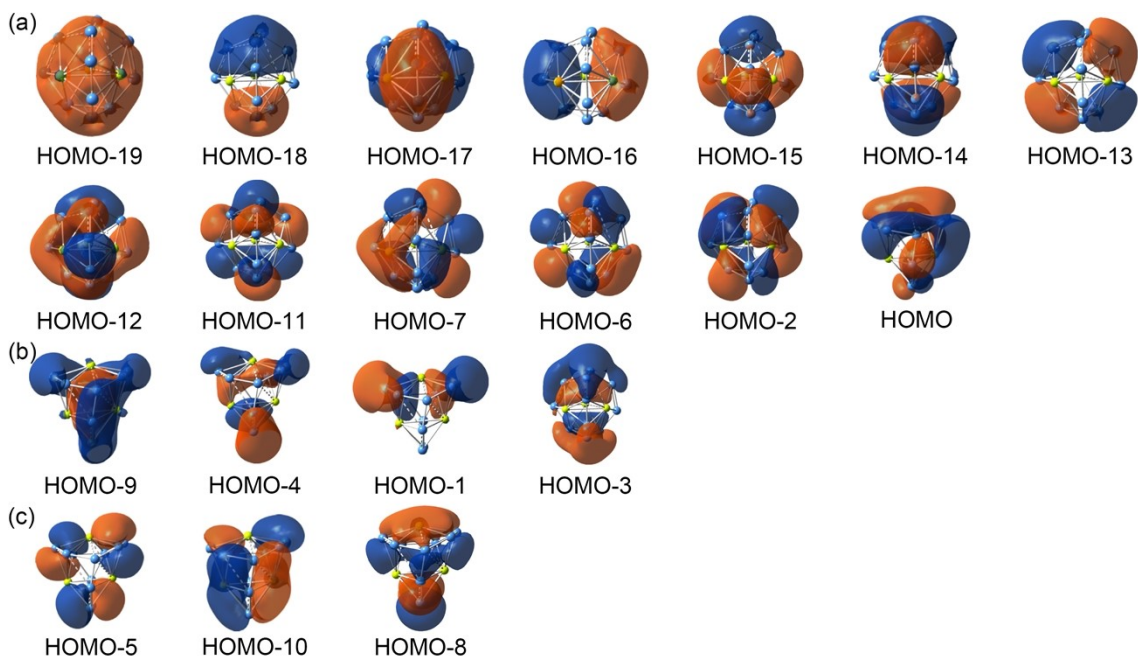

**Figure S10.** The adaptive natural density partitioning (AdNDP) bonding pattern for the TS ( $C_{1v}$ ,  $^1A$ ) structure of  $\text{Be}_3\text{B}_{11}^-$  cluster. The occupation numbers (ONs) are indicated.

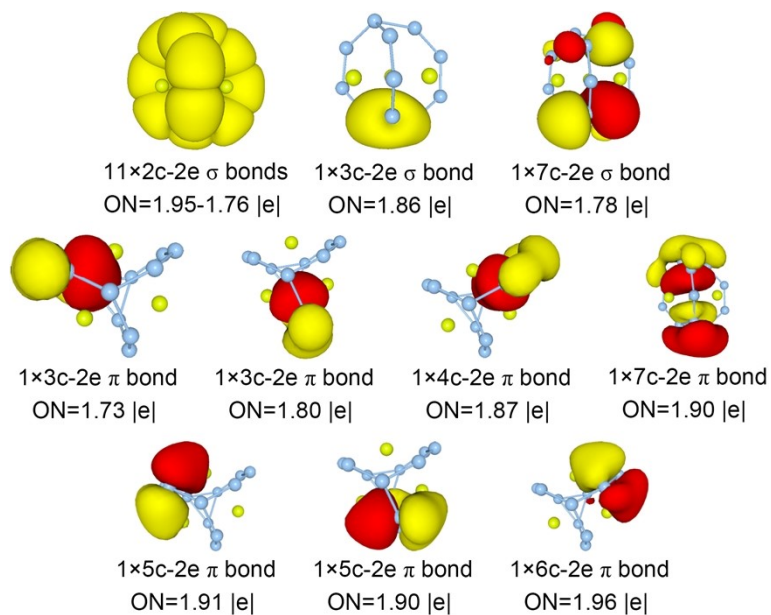

**Figure S11.** The evolution process of the delocalized (a) 6c-2e  $\sigma$  bond and (b) 6c-2e  $\pi$  bond on two  $B_3$  triangles during the interconversion between the GM and LM.

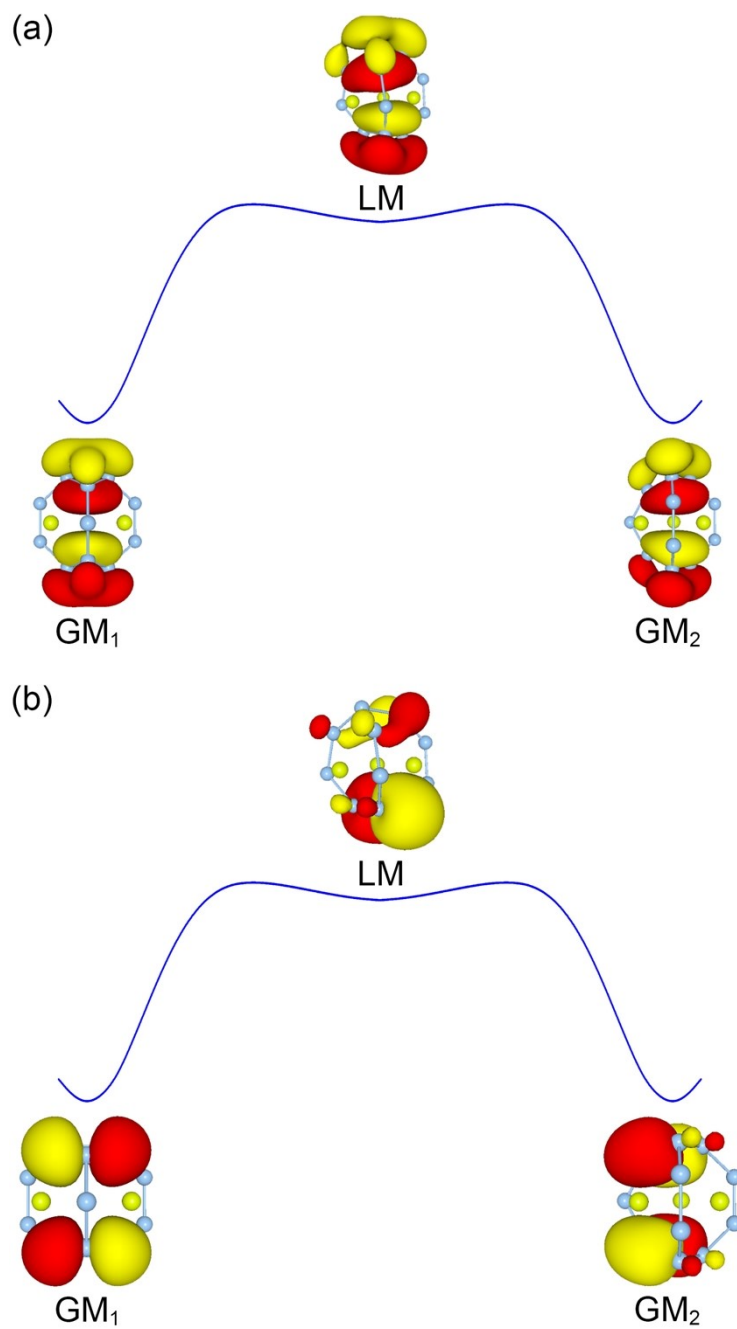



**Table S1.** Cartesian coordinates for (a) the global-minimum (GM) ( $C_{2v}$ ,  $^1A_1$ ), (b) the local minimum (LM) ( $C_s$ ,  $^1A'$ ), and (c) the transition state (TS) ( $C_1$ ,  $^1A$ ) structures of  $Be_3B_{11}^-$  cluster at the PBE0/6-311+G\* level.

**(a) GM ( $C_{2v}$ ,  $^1A_1$ )**

|    |             |             |             |
|----|-------------|-------------|-------------|
| B  | 0.78814700  | 1.72234800  | -0.28463500 |
| B  | 1.89194400  | 0.76206000  | -0.92078100 |
| B  | 1.89194400  | -0.76206000 | -0.92078100 |
| B  | 0.78814700  | -1.72234800 | -0.28463500 |
| B  | -0.78814700 | -1.72234800 | -0.28463500 |
| B  | -1.89194400 | -0.76206000 | -0.92078100 |
| B  | -1.89194400 | 0.76206000  | -0.92078100 |
| B  | -0.78814700 | 1.72234800  | -0.28463500 |
| B  | 0.00000000  | 1.32009900  | 1.25416200  |
| B  | 0.00000000  | 0.00000000  | 2.10125800  |
| B  | 0.00000000  | -1.32009900 | 1.25416200  |
| Be | -1.33685700 | 0.00000000  | 0.74955200  |
| Be | 1.33685700  | 0.00000000  | 0.74955200  |
| Be | 0.00000000  | 0.00000000  | -1.23399800 |

**(b) LM ( $C_s$ ,  $^1A'$ )**

|   |             |             |             |
|---|-------------|-------------|-------------|
| B | 1.95382700  | 0.32161400  | 0.00000000  |
| B | 1.85257700  | -1.22519100 | 0.00000000  |
| B | 0.67593300  | -2.20138200 | 0.00000000  |
| B | -0.81980800 | -1.75839700 | 0.00000000  |
| B | -1.54609900 | -0.50410300 | -0.84801500 |

|    |             |             |             |
|----|-------------|-------------|-------------|
| B  | -0.95895900 | 0.63557200  | -1.80931200 |
| B  | 0.24898400  | 1.49356700  | -1.37890900 |
| B  | 1.14715300  | 1.69340700  | 0.00000000  |
| B  | 0.24898400  | 1.49356700  | 1.37890900  |
| B  | -0.95895900 | 0.63557200  | 1.80931200  |
| B  | -1.54609900 | -0.50410300 | 0.84801500  |
| Be | -1.10312800 | 1.11408900  | 0.00000000  |
| Be | 0.36560500  | -0.60712100 | 1.17993400  |
| Be | 0.36560500  | -0.60712100 | -1.17993400 |

**(c) TS (C<sub>1</sub>, <sup>1</sup>A)**

|    |             |             |             |
|----|-------------|-------------|-------------|
| B  | -0.04852900 | 1.95010800  | -0.26736200 |
| B  | 1.45504600  | 1.62124900  | -0.48223900 |
| B  | 2.21657700  | 0.29683200  | -0.48325400 |
| B  | 1.58716500  | -1.09746500 | -0.15207800 |
| B  | 0.15737700  | -1.78208300 | -0.52902700 |
| B  | -1.09140900 | -1.26589800 | -1.40623200 |
| B  | -1.76025400 | 0.10104900  | -1.20491400 |
| B  | -1.50323800 | 1.33664600  | -0.15548300 |
| B  | -1.06154000 | 0.84696900  | 1.38679200  |
| B  | -0.39740000 | -0.39050900 | 2.04179100  |
| B  | 0.42759900  | -1.37271000 | 1.10522200  |
| Be | -1.24351000 | -0.86014500 | 0.42079500  |
| Be | 0.93671500  | 0.48264200  | 1.00399400  |
| Be | 0.33005300  | 0.07226600  | -1.24130900 |
